# Supplementary material for: Efficient and robust strong-field control of population transfer in sensitizer dyes with designed femtosecond laser pulses
Source: Royal Society of Chemistry journal article supplement (doi:10.1039/c0cp02723e), 2011-01-01
Supplement: c0cp02723e.pdf [file c0cp02723e.pdf]

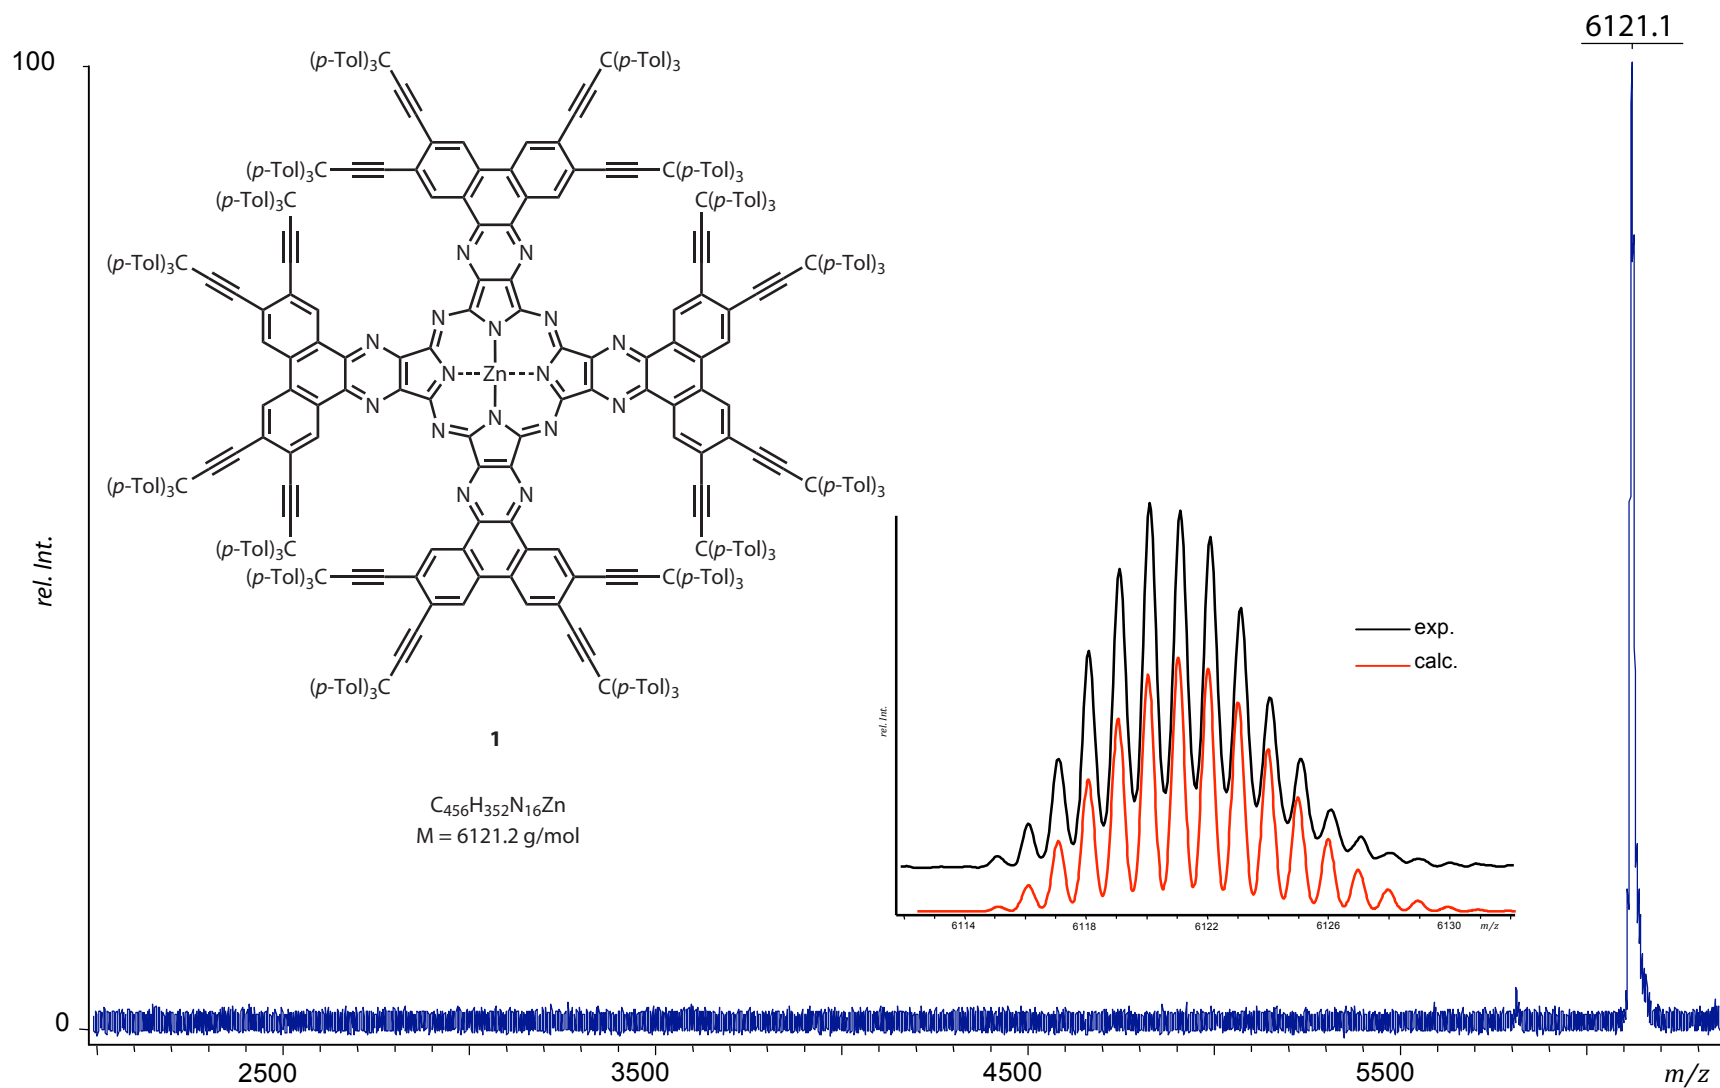

**Figure 1:** Mass spectrum of propyrazine **1** measured by MALDI-TOF in positive mode with DCTB as matrix; the inset shows the calculated and the experimental mass of compound **1** in comparison

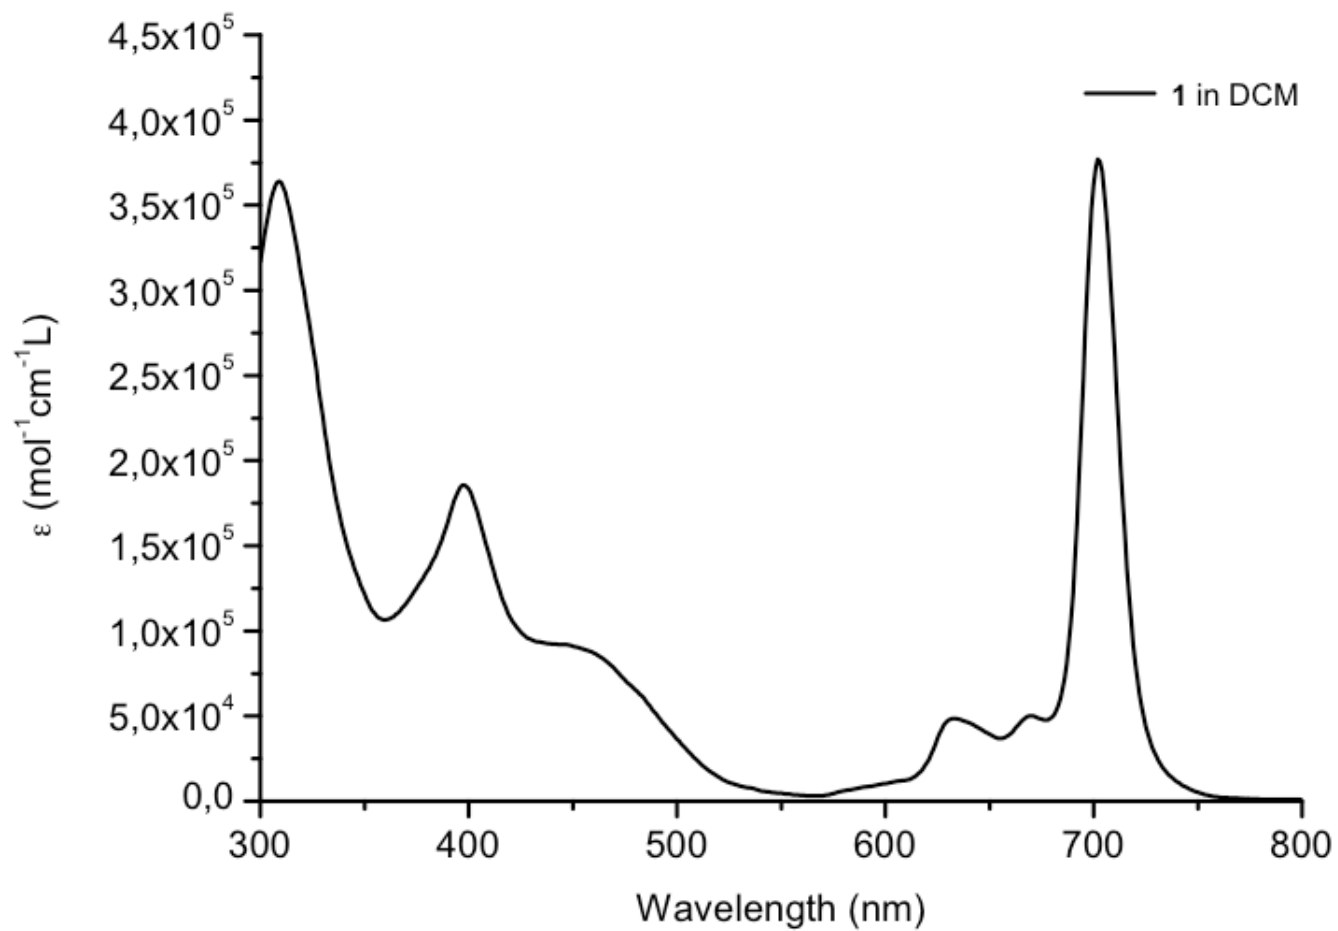

**Figure 2:** Electronic absorption spectrum of porphyrazine 1 in dichloromethane (DCM) measured at room temperature.

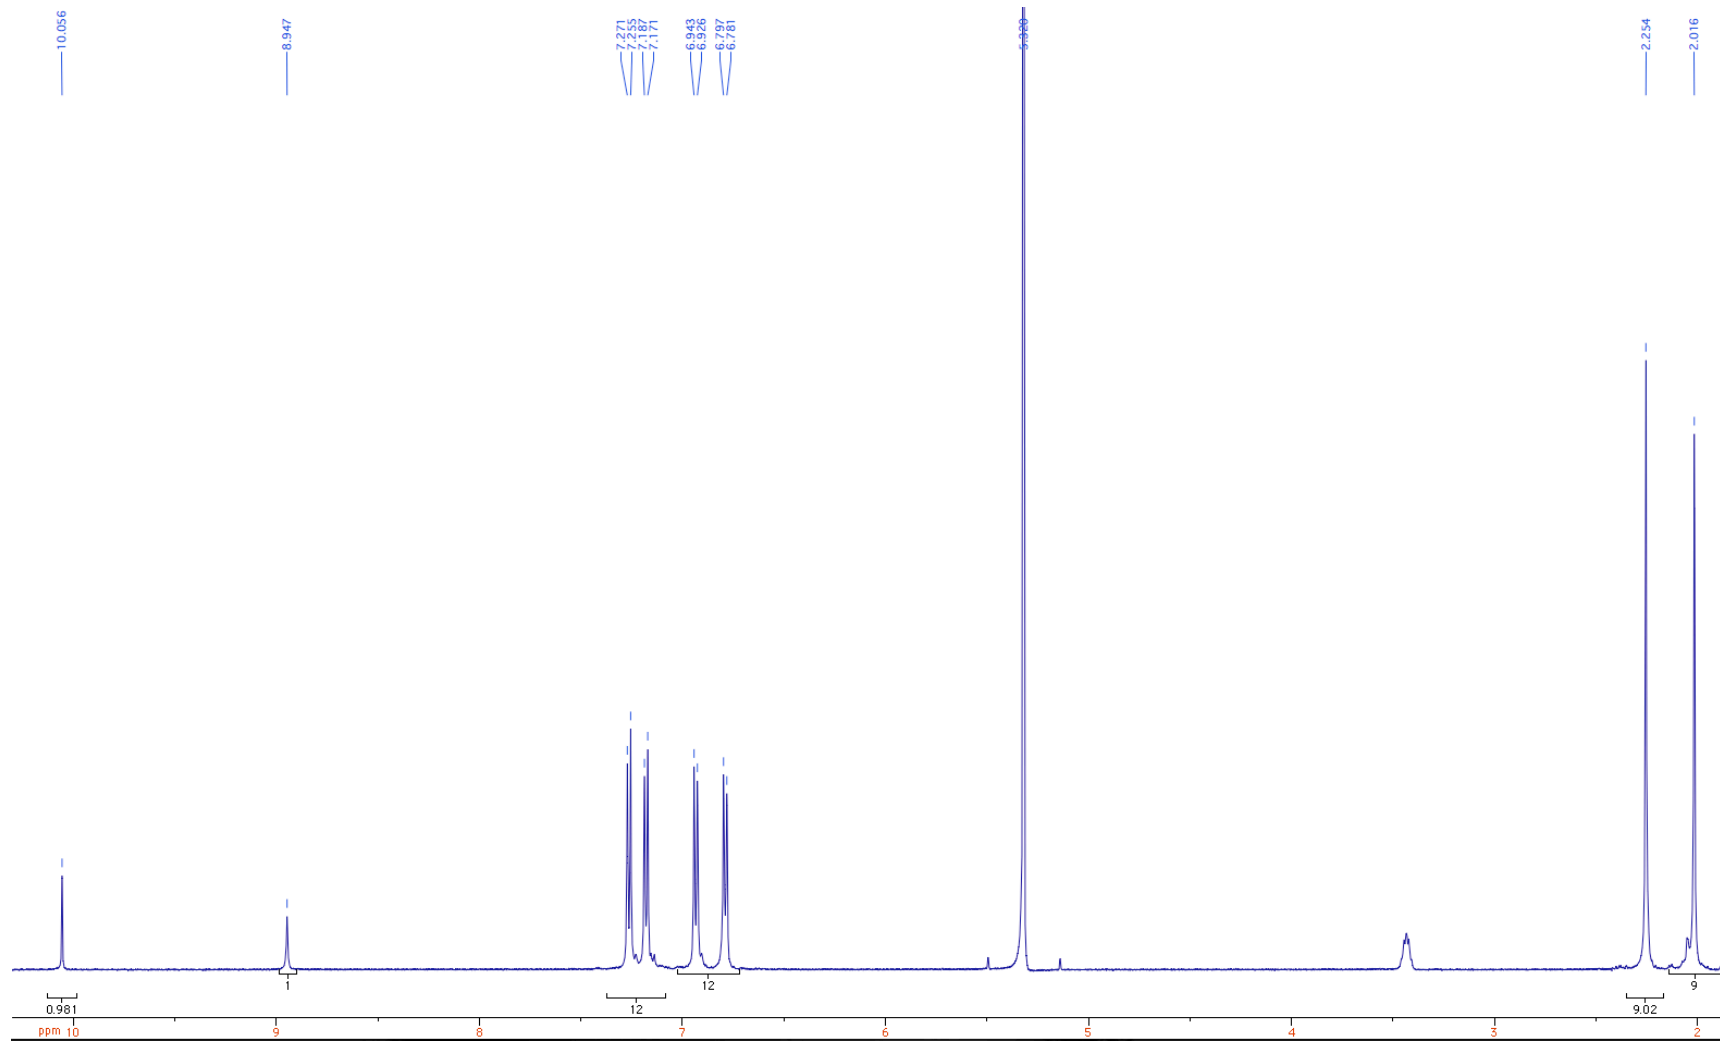

**Figure 3:** Proton NMR-spectrum of porphyrazine 1 in dichloromethane-d<sub>2</sub> at 293.15 K.
